# Supplementary material for: Bidirectional correlation between gastroesophageal reflux disease and sleep problems: a systematic review and meta-analysis
Source: PeerJ journal article supplement (doi:10.7717/peerj.17202), 2024-04-16

Meta-analysis random-effects estimates (exponential form)

Study omitted

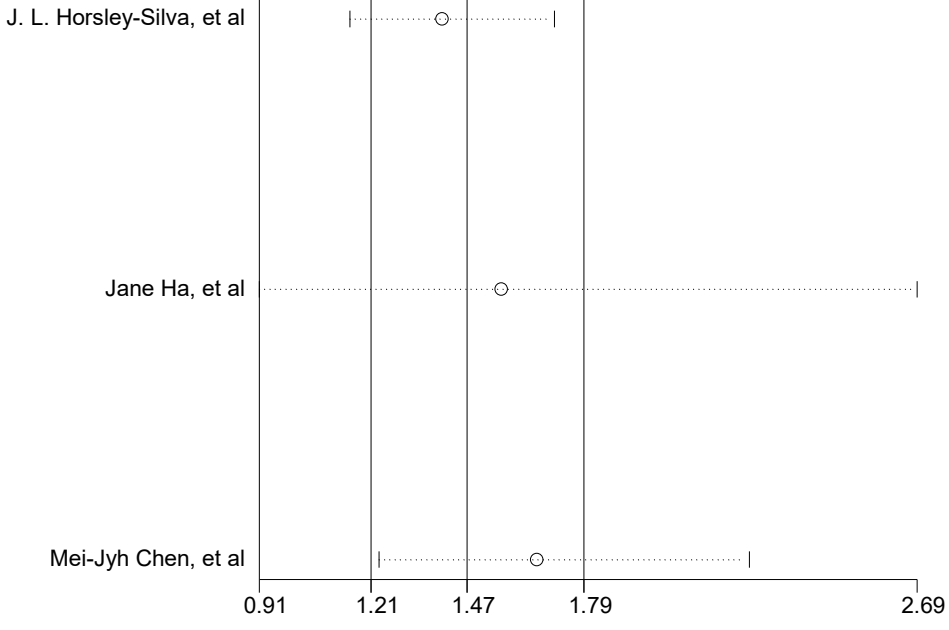

Supplement: Fig_S4.pdf [file Fig_S4.pdf]
