# Supplementary material for: Bidirectional correlation between gastroesophageal reflux disease and sleep problems: a systematic review and meta-analysis
Source: PeerJ journal article supplement (doi:10.7717/peerj.17202), 2024-04-16
Supplement: Fig_S5.pdf [file Fig_S5.pdf]

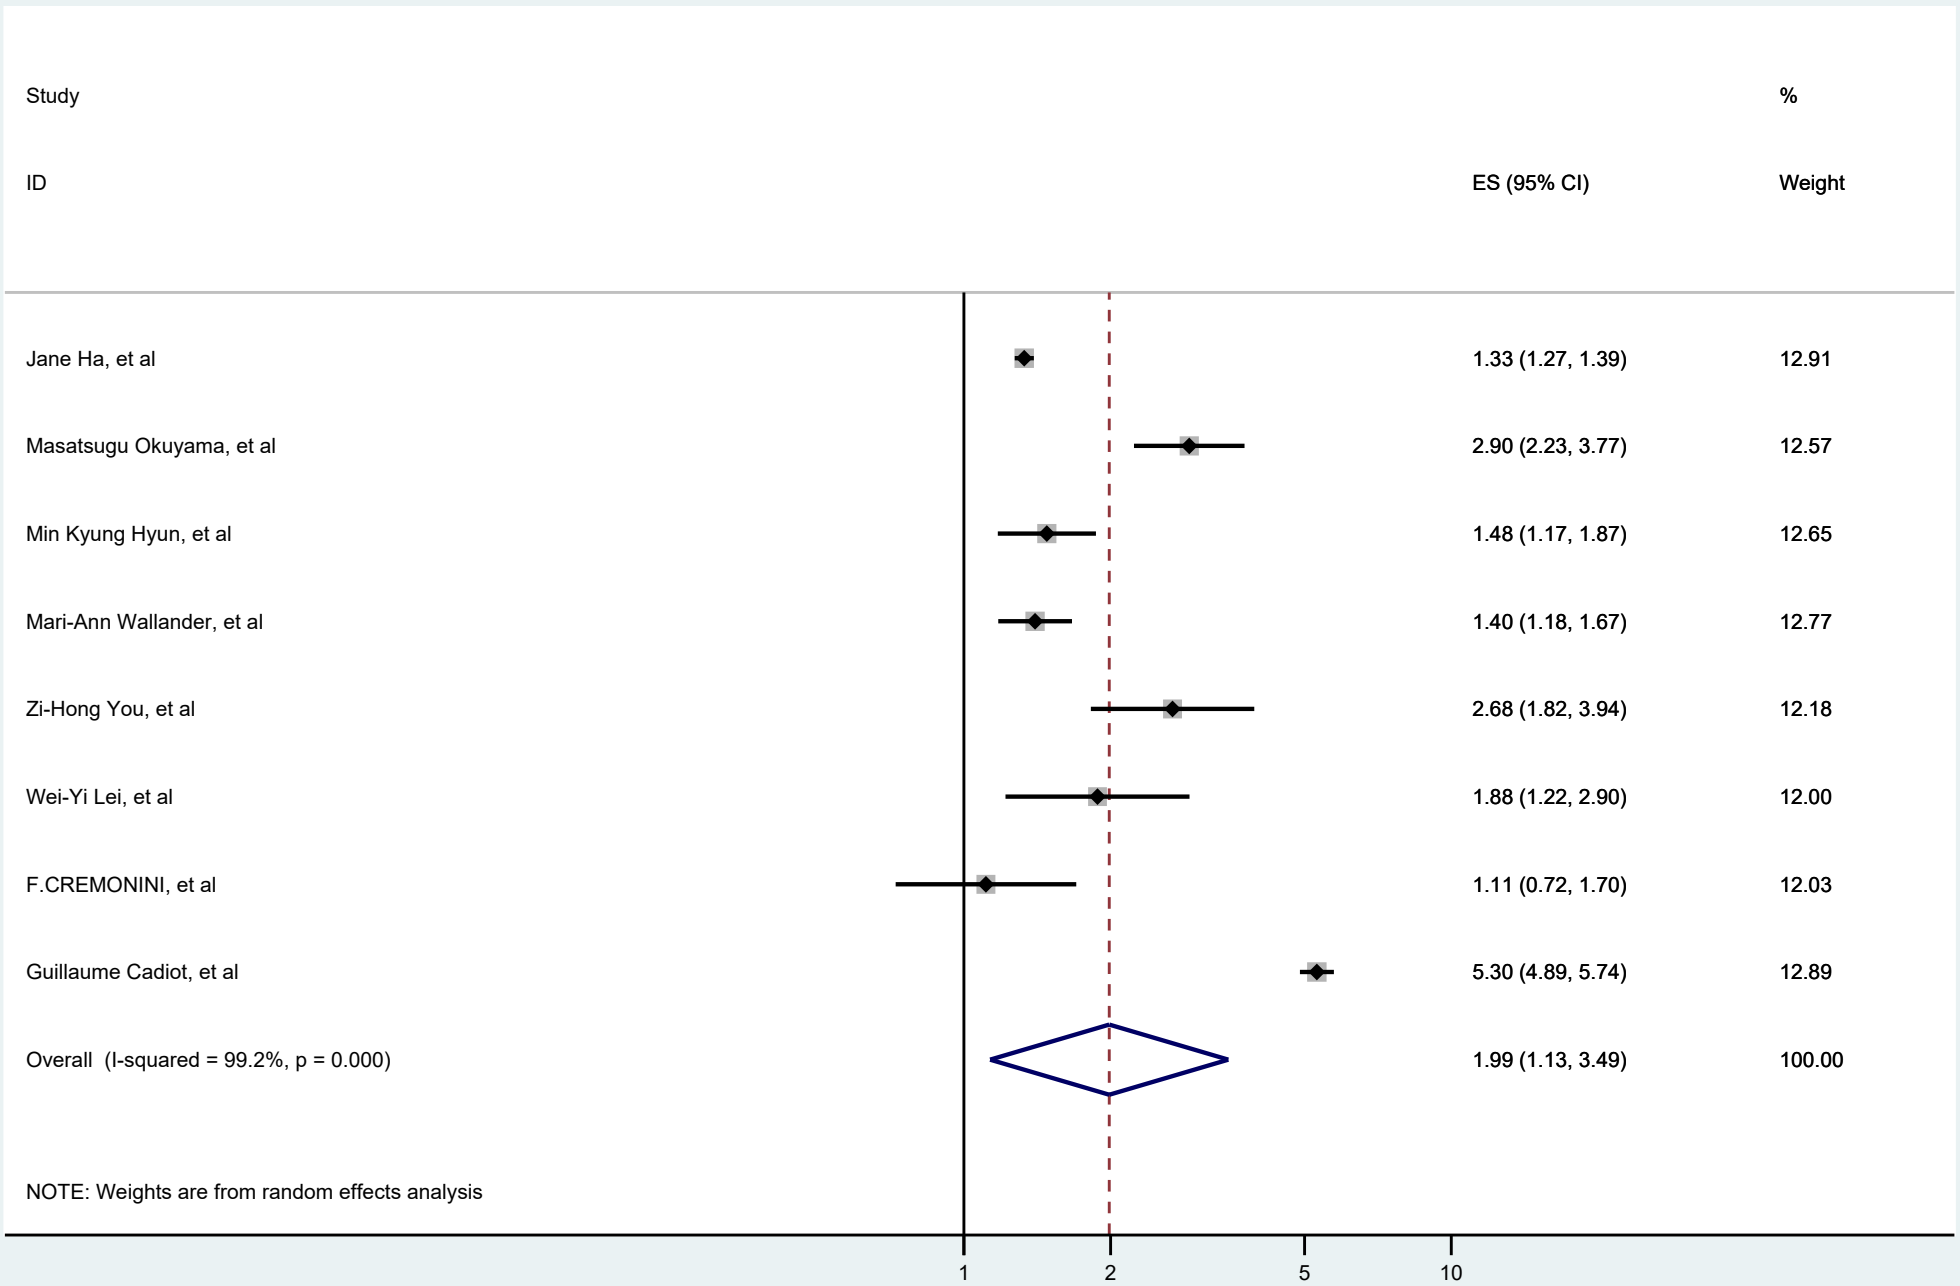

NOTE: Weights are from random effects analysis
